# Supplementary material for: Functional validation of the anaplastic lymphoma kinase signature identifies CEBPB and Bcl2A1 as critical target genes
Source: JCI journal article supplement (doi:10.1172/jci29401), 2006-11-17
Supplement: sd1 [file 1]

A

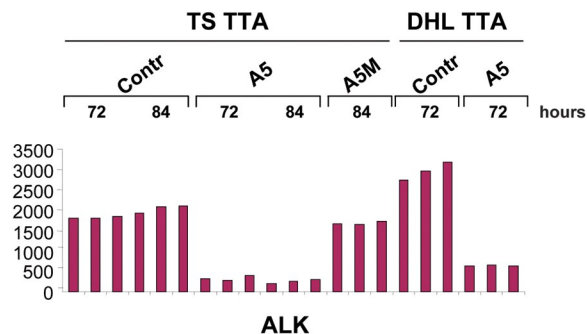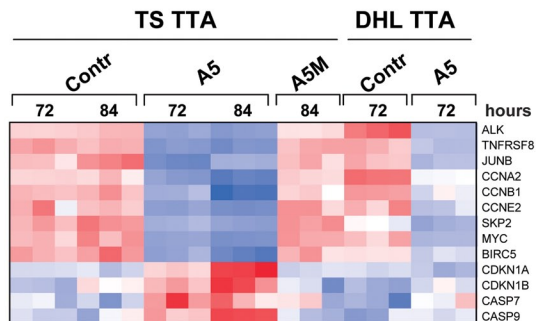

B

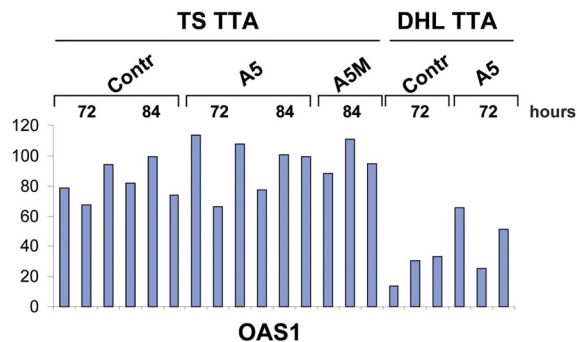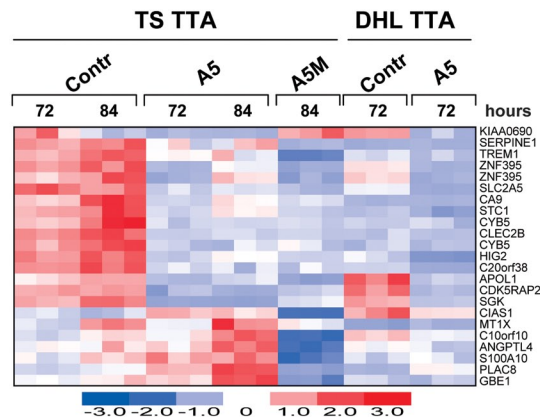

# Suppl. 2

## A

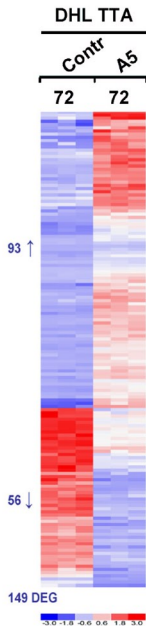

## B

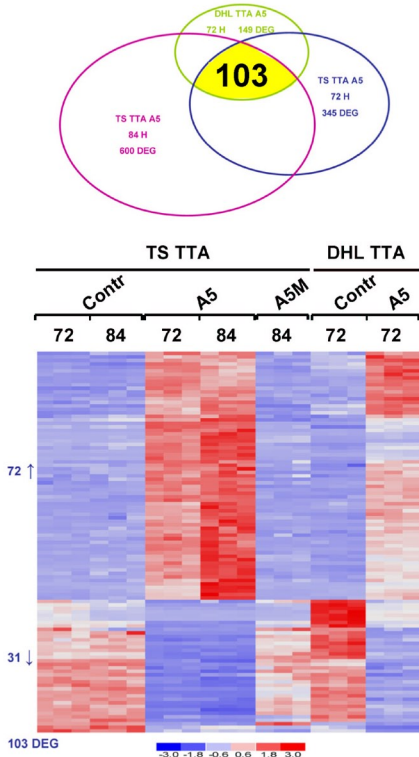

# Suppl. 3

## A

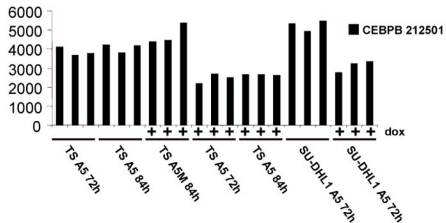

## B

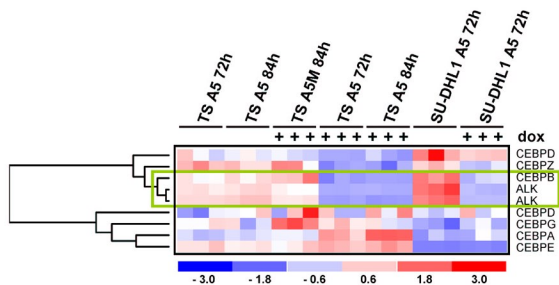

## C

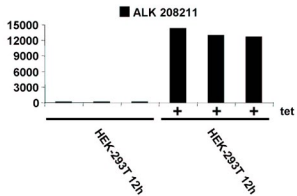

## D

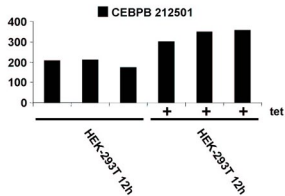

## E

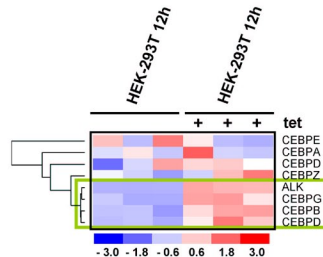

| Probe Set ID | RefSeq Transcript ID                              | Gene Title                                                                                               | Gene Symbol                             | FC<br>ALK shRNA | FC<br>ALK inhibitors |
|--------------|---------------------------------------------------|----------------------------------------------------------------------------------------------------------|-----------------------------------------|-----------------|----------------------|
| 205980_s_at  | NM_001017526 ///<br>NM_181334 ///<br>NM_181335    | Rho GTPase activating protein 8 /// PRR5-<br>ARHGAP8 fusion                                              | ARHGAP8 ///<br>LOC553158                | -68.5           | -5.5                 |
| 204456_s_at  | NM_002048                                         | growth arrest-specific 1                                                                                 | GAS1                                    | -62.1           | -33.6                |
| 201739_at    | NM_005627                                         | serum/glucocorticoid regulated kinase                                                                    | SGK                                     | -44.9           | -4.2                 |
| 214637_at    | NM_020530                                         | oncostatin M                                                                                             | OSM                                     | -12.1           | -29.5                |
| 204457_s_at  | NM_002048                                         | growth arrest-specific 1                                                                                 | GAS1                                    | -7.6            | -8.1                 |
| 211269_s_at  | NM_000417                                         | interleukin 2 receptor, alpha                                                                            | IL2RA                                   | -7.5            | -3.8                 |
| 209325_s_at  | NM_002928                                         | regulator of G-protein signalling 16                                                                     | RGS16                                   | -7.1            | -10.5                |
| 210439_at    | NM_012092                                         | inducible T-cell co-stimulator                                                                           | ICOS                                    | -6.7            | -11.0                |
| 205518_s_at  | NR_002174                                         | cytidine monophosphate-N-acetylneuraminic<br>acid hydroxylase (CMP-N-acetylneuraminate<br>monooxygenase) | CMAH                                    | -5.1            | -3.1                 |
| 205476_at    | NM_004591                                         | chemokine (C-C motif) ligand 20                                                                          | CCL20                                   | -5.0            | -159.0               |
| 220081_x_at  | NM_016371                                         | hydroxysteroid (17-beta) dehydrogenase 7                                                                 | HSD17B7                                 | -4.1            | -3.6                 |
| 202431_s_at  | NM_002467                                         | v-myc myelocytomatosis viral oncogene<br>homolog (avian)                                                 | MYC                                     | -4.1            | -164.7               |
| 214794_at    | NM_006191                                         | proliferation-associated 2G4, 38kDa                                                                      | PA2G4                                   | -4.0            | -3.4                 |
| 208676_s_at  | NM_006191                                         | proliferation-associated 2G4, 38kDa                                                                      | PA2G4                                   | -3.9            | -3.3                 |
| 206729_at    | NM_001243 ///<br>NM_152942                        | tumor necrosis factor receptor superfamily,<br>member 8                                                  | TNFRSF8                                 | -3.8            | -9.8                 |
| 219471_at    | NM_025113                                         | chromosome 13 open reading frame 18                                                                      | C13orf18                                | -3.6            | -2.9                 |
| 203498_at    | NM_005822                                         | Down syndrome critical region gene 1-like 1                                                              | DSCR1L1                                 | -3.5            | -4.6                 |
| 220358_at    | NM_018664                                         | Jun dimerization protein p21SNFT                                                                         | SNFT                                    | -3.4            | -5.7                 |
| 218708_at    | NM_013248                                         | NTF2-like export factor 1                                                                                | NXT1                                    | -3.2            | -3.2                 |
| 220688_s_at  | NM_016183                                         | chromosome 1 open reading frame 33                                                                       | C1orf33                                 | -3.1            | -5.7                 |
| 205681_at    | NM_004049                                         | BCL2-related protein A1                                                                                  | BCL2A1                                  | -3.1            | -8.2                 |
| 217850_at    | NM_014366 ///<br>NM_206825 ///<br>NM_206826       | guanine nucleotide binding protein-like 3<br>(nucleolar)                                                 | GNL3                                    | -3.0            | -3.2                 |
| 205227_at    | NM_002182 ///<br>NM_134470                        | interleukin 1 receptor accessory protein                                                                 | IL1RAP                                  | -3.0            | -3.7                 |
| 212942_s_at  | NM_018689                                         | KIAA1199                                                                                                 | KIAA1199                                | -2.9            | -25.9                |
| 213113_s_at  | NM_014096 ///<br>NM_017611 ///<br>NM_199329       | solute carrier family 43, member 3                                                                       | SLC43A3                                 | -2.7            | -3.5                 |
| 219117_s_at  | NM_016594                                         | FK506 binding protein 11, 19 kDa                                                                         | FKBP11                                  | -2.6            | -2.4                 |
| 205249_at    | NM_000399                                         | early growth response 2 (Krox-20 homolog,<br>Drosophila)                                                 | EGR2                                    | -2.6            | -7.4                 |
| 218336_at    | NM_012394                                         | prefoldin subunit 2                                                                                      | PFDN2                                   | -2.4            | -2.4                 |
| 201479_at    | NM_001363                                         | dyskeratosis congenita 1, dyskerin                                                                       | DKC1                                    | -2.4            | -2.6                 |
| 214141_x_at  | NM_001031684                                      | splicing factor, arginine/serine-rich 7, 35kDa                                                           | SFRS7                                   | -2.3            | -2.7                 |
| 201105_at    | NM_002305                                         | lectin, galactoside-binding, soluble, 1<br>(galectin 1)                                                  | LGALS1                                  | 2.5             | 1.9                  |
| 214290_s_at  | NM_001040874 ///<br>NM_003516 ///<br>XM_928387    | histone 2, H2aa /// similar to Histone H2A.o<br>(H2A/o) (H2A.2) (H2a-615) /// histone H2A/r              | HIST2H2AA ///<br>LOC653610 ///<br>H2A/R | 2.5             | 3.3                  |
| 219014_at    | NM_016619                                         | placenta-specific 8                                                                                      | PLAC8                                   | 2.7             | 2.6                  |
| 208611_s_at  | NM_003127                                         | spectrin, alpha, non-erythrocytic 1 (alpha-<br>fodrin)                                                   | SPTAN1                                  | 3.1             | 3.3                  |
| 201651_s_at  | NM_007229                                         | protein kinase C and casein kinase substrate<br>in neurons 2                                             | PACSIN2                                 | 3.4             | 3.1                  |
| 217122_s_at  | NM_182838                                         | solute carrier family 35, member E2                                                                      | SLC35E2                                 | 4.9             | 4.0                  |
| 202039_at    | NM_004740 ///<br>NM_078471 ///<br>NM_203318       | TGFB1-induced anti-apoptotic factor 1 ///<br>myosin XVIIIa                                               | TIAF1 ///<br>MYO18A                     | 5.3             | 3.6                  |
| 212099_at    | NM_004040                                         | ras homolog gene family, member B                                                                        | RHOB                                    | 5.5             | 3.8                  |
| 209118_s_at  | NM_006009                                         | tubulin, alpha 3                                                                                         | TUBA3                                   | 6.1             | 2.3                  |
| 214925_s_at  | NM_003127                                         | spectrin, alpha, non-erythrocytic 1 (alpha-<br>fodrin)                                                   | SPTAN1                                  | 6.4             | 8.5                  |
| 211986_at    | NM_001620 ///<br>NM_024060                        | AHNAK nucleoprotein (desmoyokin)                                                                         | AHNAK                                   | 6.6             | 3.2                  |
| 201010_s_at  | NM_006472                                         | thioredoxin interacting protein                                                                          | TXNIP                                   | 7.6             | 12.9                 |
| 209684_at    | NM_018993                                         | Ras and Rab interactor 2                                                                                 | RIN2                                    | 7.6             | 4.6                  |
| 205447_s_at  | NM_006301                                         | mitogen-activated protein kinase kinase<br>kinase 12                                                     | MAP3K12                                 | 8.0             | 8.2                  |
| 201008_s_at  | NM_006472                                         | thioredoxin interacting protein                                                                          | TXNIP                                   | 8.0             | 23.2                 |
| 201009_s_at  | NM_006472                                         | thioredoxin interacting protein                                                                          | TXNIP                                   | 8.5             | 17.9                 |
| 218537_at    | NM_001002017 ///<br>NM_001002018 ///<br>NM_017885 | host cell factor C1 regulator 1 (XPO1<br>dependent)                                                      | HCFC1R1                                 | 8.7             | 15.0                 |

**Figure S1.** Specificity of NPM-ALK knock-down by inducible shRNA. (A) ALK transcripts are significantly down-modulated after shRNA induction. *ALK* mRNA expression levels of TS-TTA-A5, TS-TTA-A5M, and Su-DHL1 cells (21 samples) are shown as assessed by microarray analysis. (B) Eisen plot of the expression of the selected genes as assessed by microarray analysis. (C) *OAS1* gene transcripts do not correlated with shRNA induction. Gene expression quantification of the classic interferon target gene *OAS1* as assessed by microarray analysis. (D) The genes specifically expressed in TS-TTA-A5M cells represent a minimum subset. Eisen plot of the expression of the genes uniquely modulated after DOX treatment of TTA-A5M cells (84 hours).

**Figure S2.** Validation of the NPM-ALK signature in Su-DHL1 cells. (A) ALK signature in SuDHL-1 cells. Identification of genes specifically expressed in Su-DHL1-TTA-A5 cells untreated *versus* treated with DOX (72 hours) by supervised analysis (3 *versus* 3). (B) Eisen plot of the expression values of the 103 common transcripts (72 increased and 31 decreased genes), which overlap after the comparison of the gene lists identified by the supervised analysis related to either to ALK silencing in Su-DHL-1-TTA-A5 or TS-TTA-A5 cells.

**Figure S3.** ALK signaling regulates the expression of C/EBP $\beta$  in lymphoid and non-lymphoid cells. (A) C/EBP $\beta$  expression is down-regulated after ALK silencing. In the histogram C/EBP $\beta$  mRNA expression levels (21 samples) are represented as assessed by microarray analysis. (B) The expression of C/EBP $\beta$  among the CEBP family members correlates the most with that of ALK. The expression of C/EBP family genes was evaluated in all experimental conditions (21 samples) for absolute correlation with ALK. The *CEBPB* gene clustered within the branch including the ALK probe set (green rectangle). (C) ALK expression is upregulated after tetracycline induction in HEK-293T NPM-ALK Tet-On cells. In the histogram ALK mRNA expression levels (6 samples) are represented as assessed by microarray analysis. (D) CEBPB expression is concomitantly upregulated after tetracycline

induction in HEK-293T NPM-ALK Tet-On cells. In the histogram CEBPB mRNA expression levels (6 samples) are represented as assessed by microarray analysis. (E) CEBPG//B/D expressions are most closely related to ALK expression in non-lymphoid cells. Expression of CEBP family genes evaluated in different experimental conditions (6 samples) for absolute correlation with ALK. The C/EBPG/B/G genes clustered within the branch including the ALK probe set (green rectangle).

**Table S1.** Common transcripts concordantly modulated across shRNA- and ALK inhibitor-treated TS-TTA-A5 cells. FC: Fold Change
